# Supplementary material for: Oxadiazolyl-pyridines and perfluoroalkyl-carboxylic acids as building blocks for protic ionic liquids: crossing the thin line between ionic and hydrogen bonded materials
Source: Royal Society of Chemistry journal article supplement (doi:10.1039/c2cp42467c), 2012-01-01
Supplement: c2cp42467c.pdf [file c2cp42467c.pdf]

# Electronic Supplementary Information

## **Oxadiazolypyridines and perfluoroalkylcarboxylic acids as building blocks for protic ionic liquids: crossing the thin line between ionic and hydrogen bonded materials.**

**I. Pibiri,<sup>\*a</sup> A. Pace,<sup>a,b</sup> S. Buscemi,<sup>a</sup> V. Causin,<sup>c</sup> F. Rastrelli,<sup>c</sup> G. Saielli<sup>\*d</sup>**

Phys. Chem. Chem. Phys.

## IR spectra of compounds 7-24.

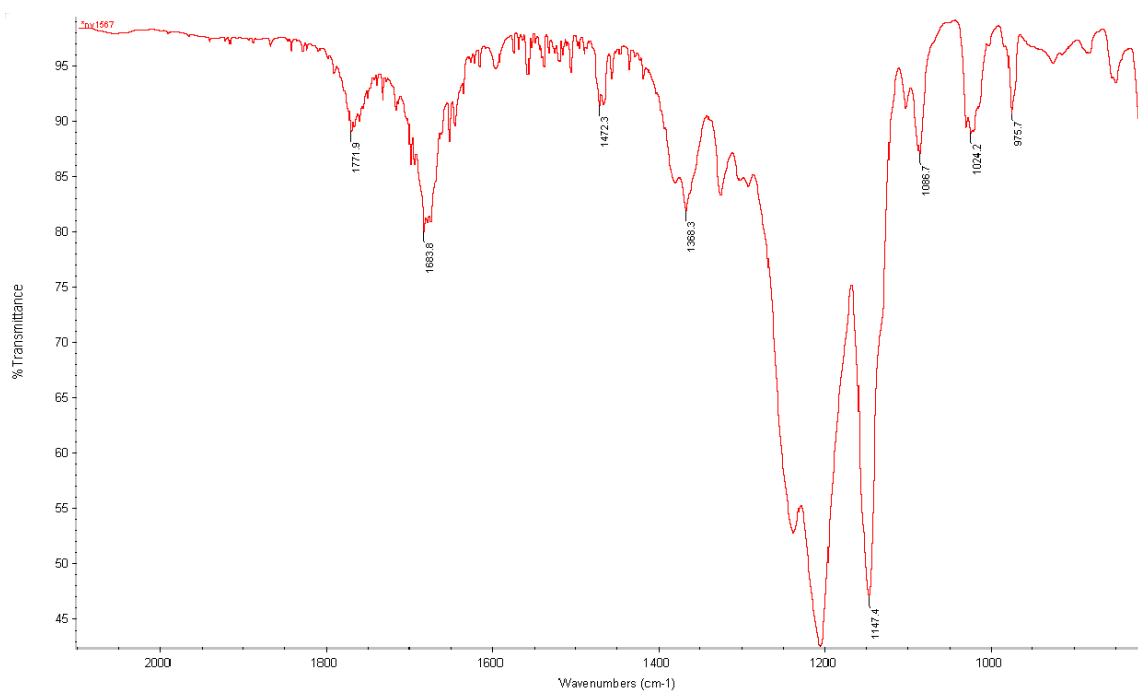

Fig. 1 IR spectrum of **7**

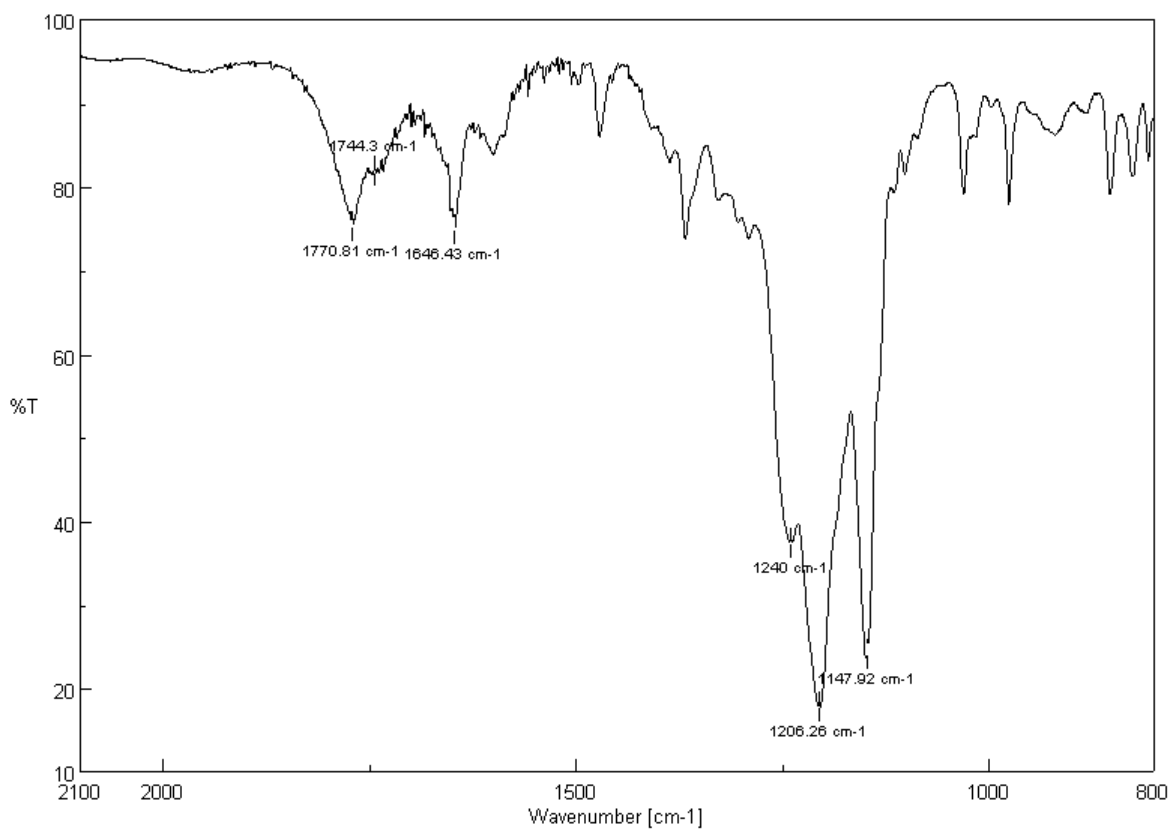

Fig. 2 IR spectrum of **8**

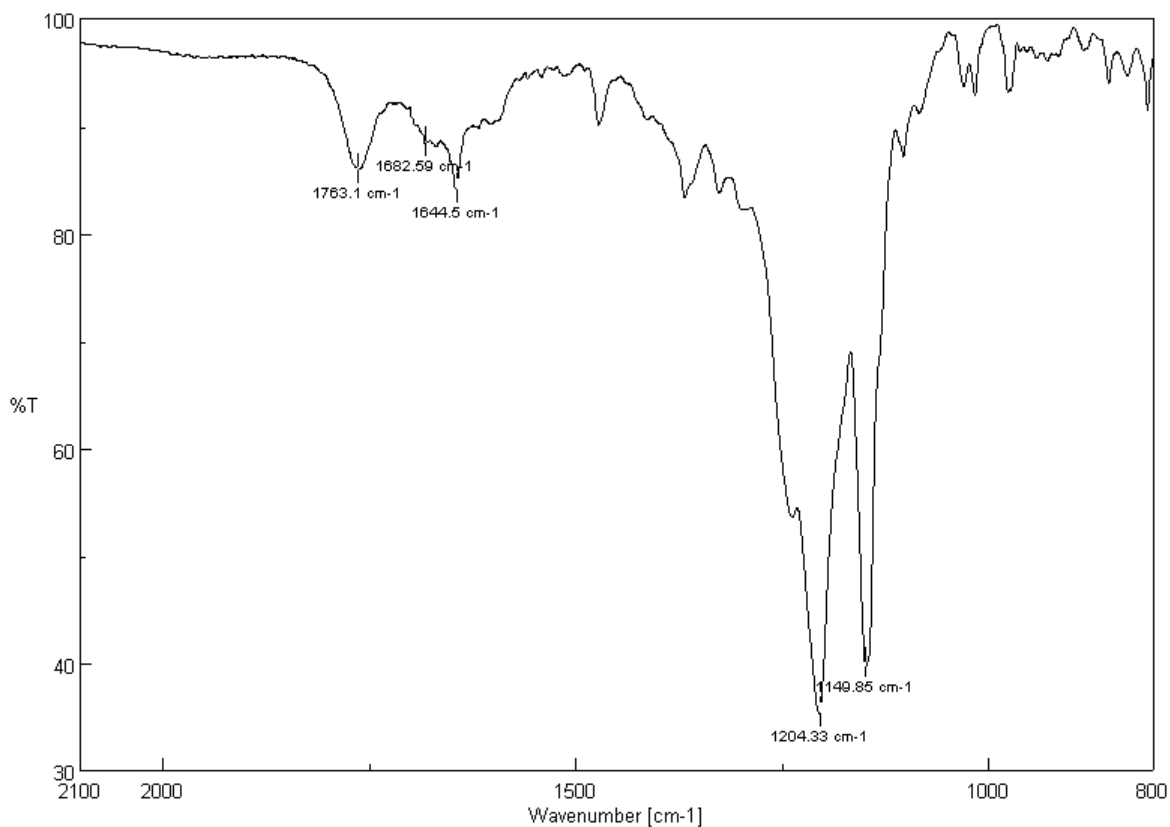

Fig. 3 IR spectrum of **9**

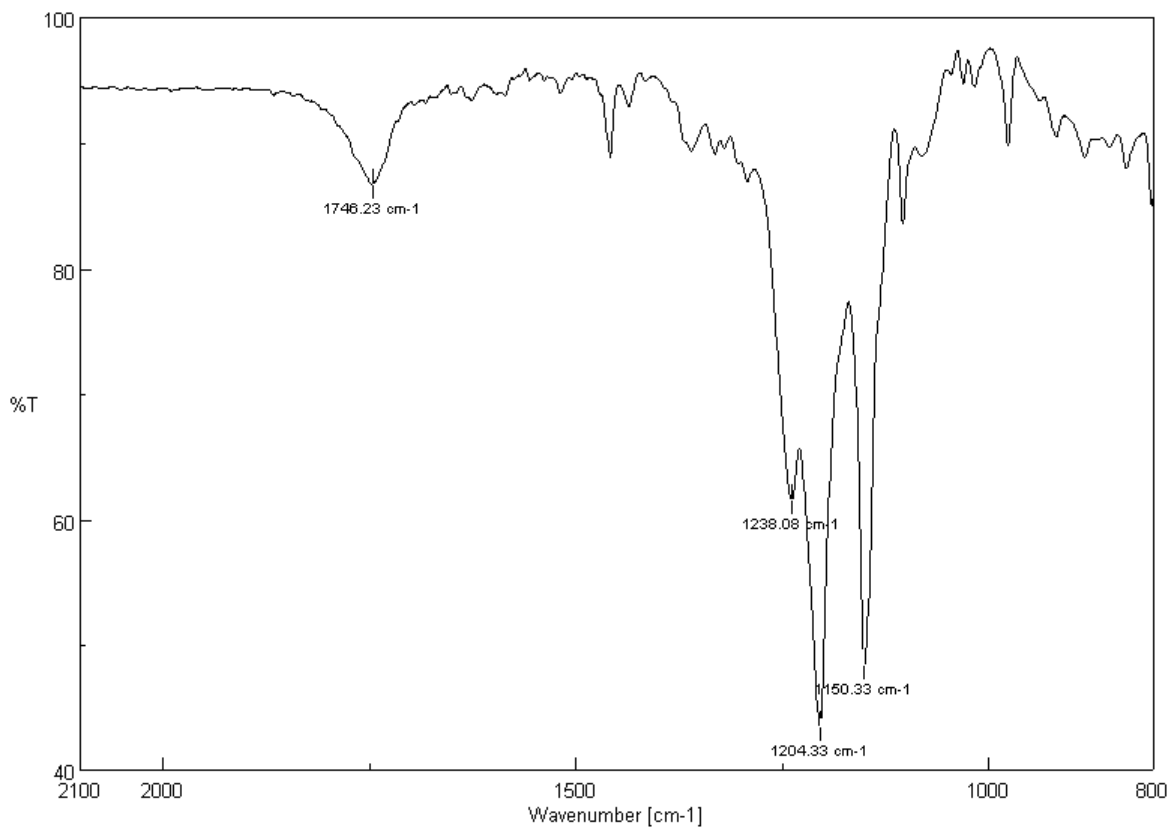

Fig. 4 IR spectrum of **10**

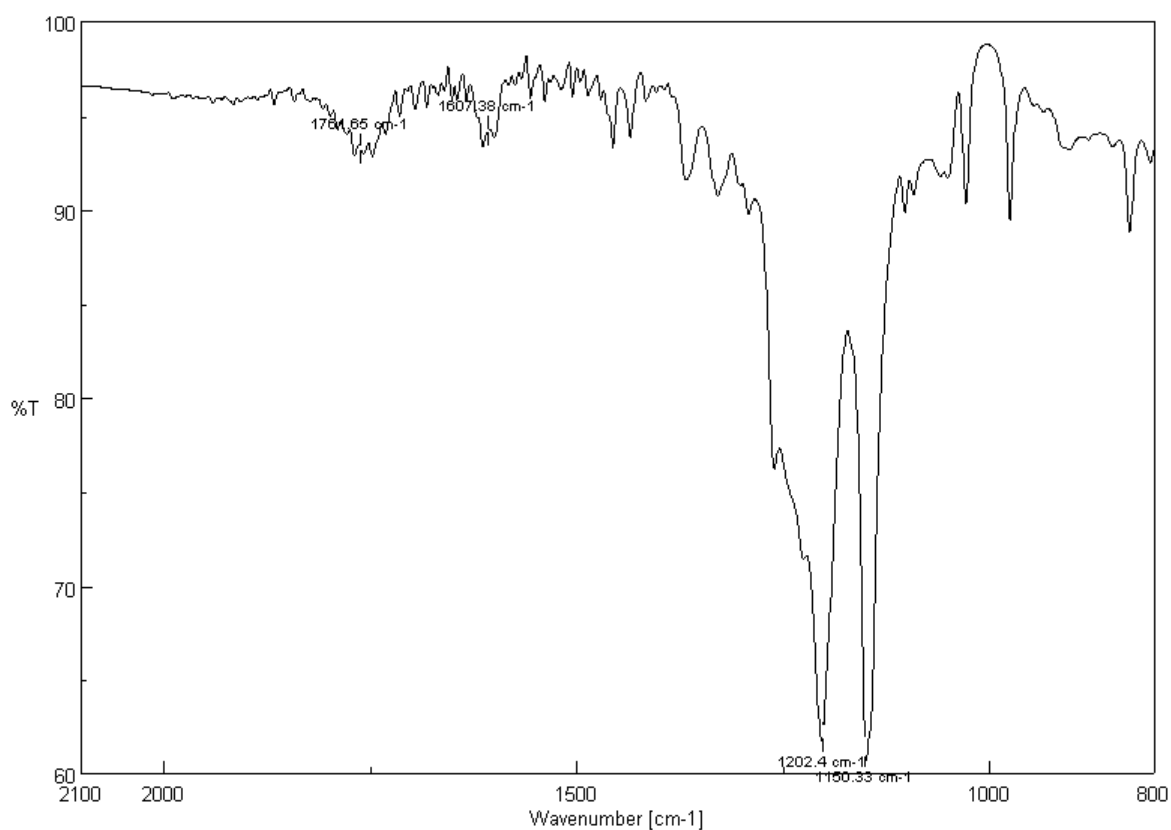

Fig. 5 IR spectrum of **11**

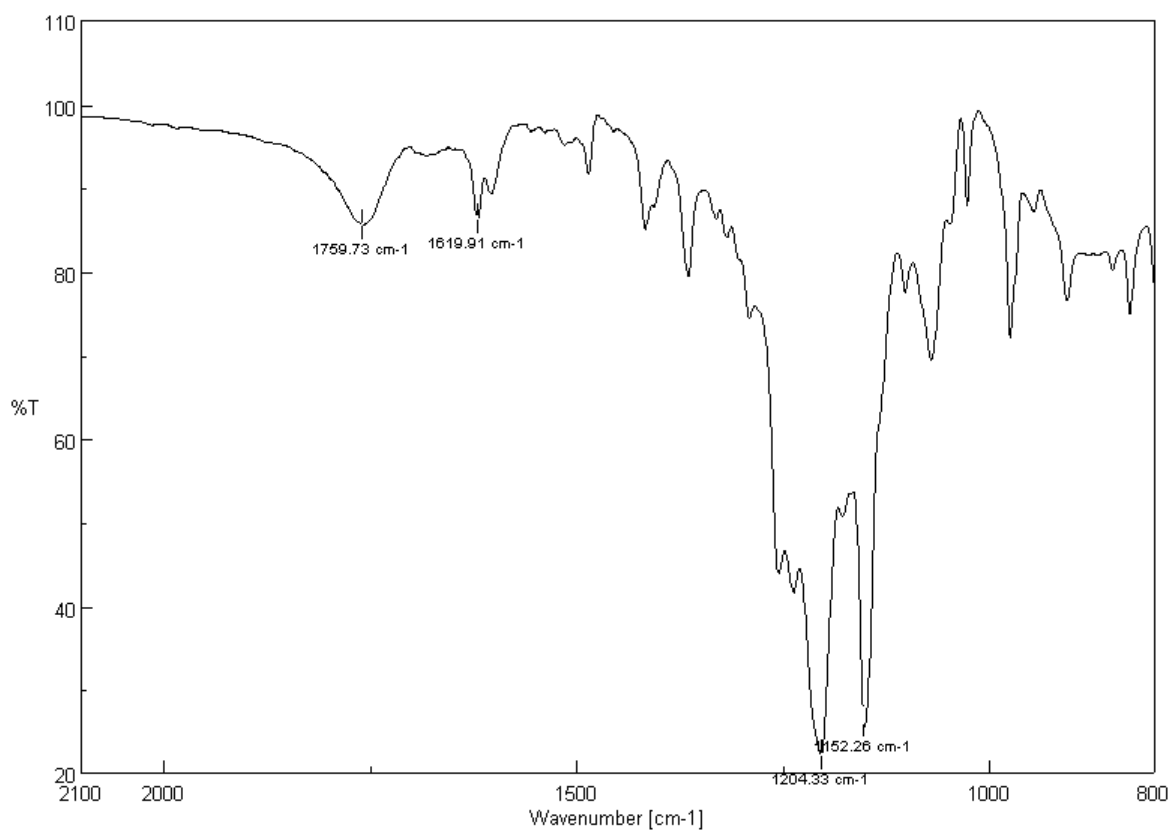

Fig. 6 IR spectrum of **12**

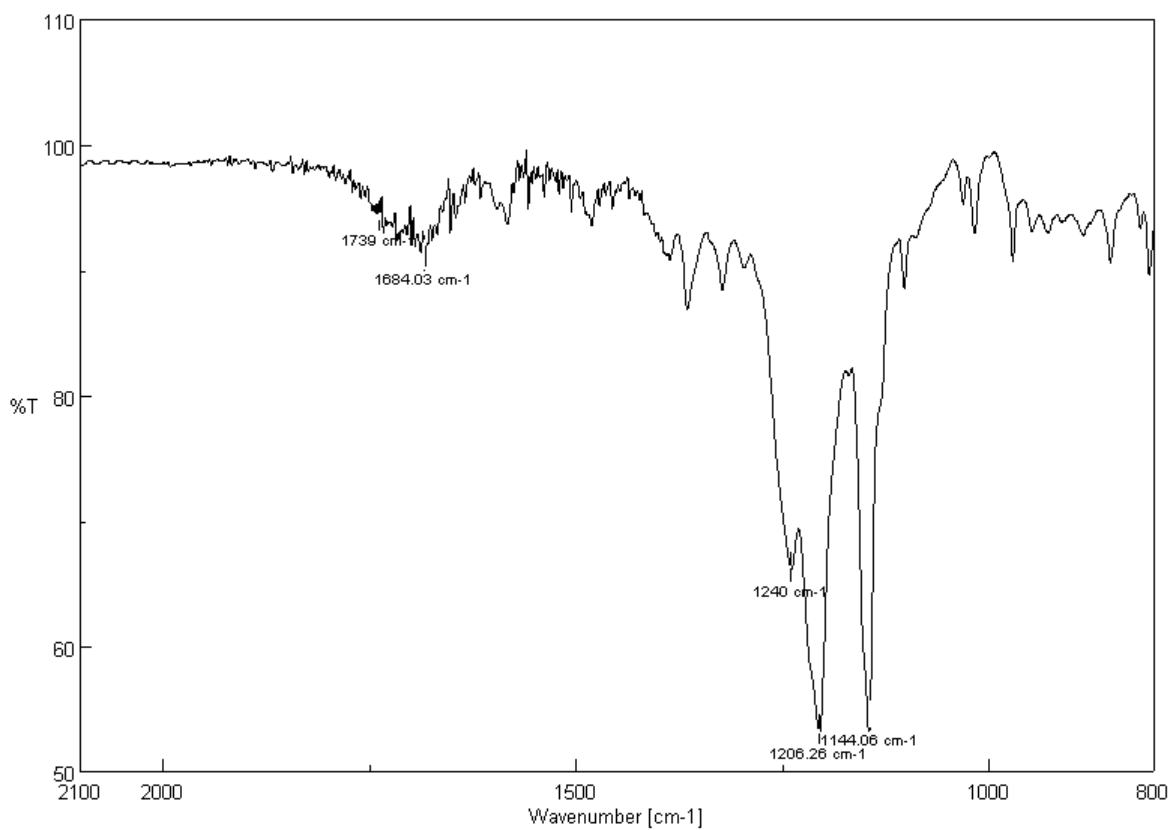

Fig. 7 IR spectrum of **13**

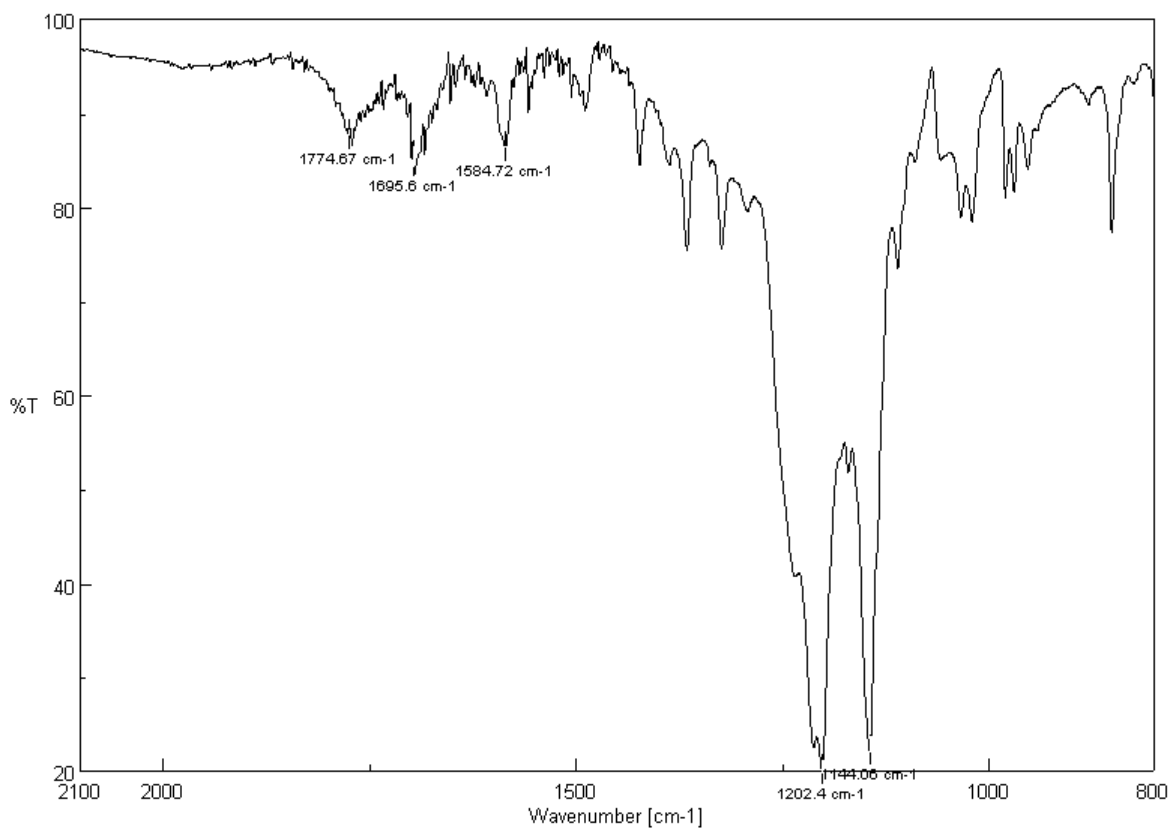

Fig. 8 IR spectrum of **14**

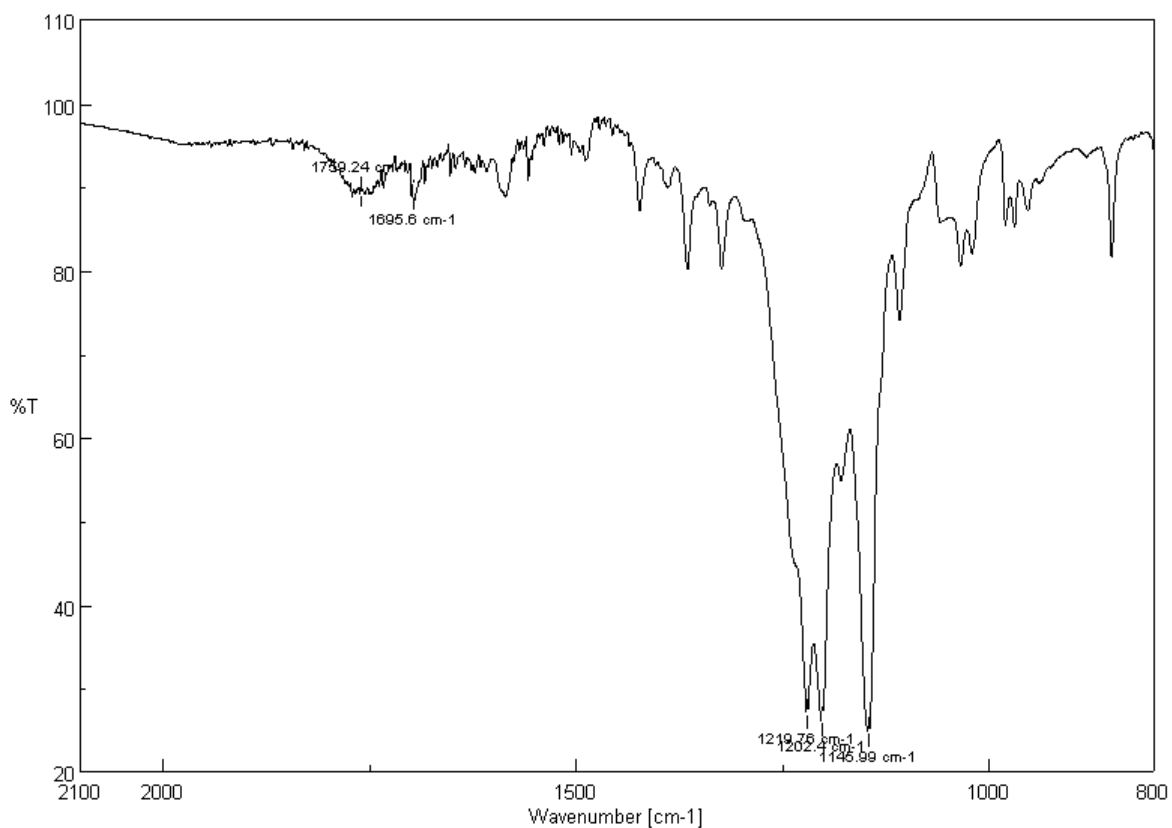

Fig. 9 IR spectrum of **15**

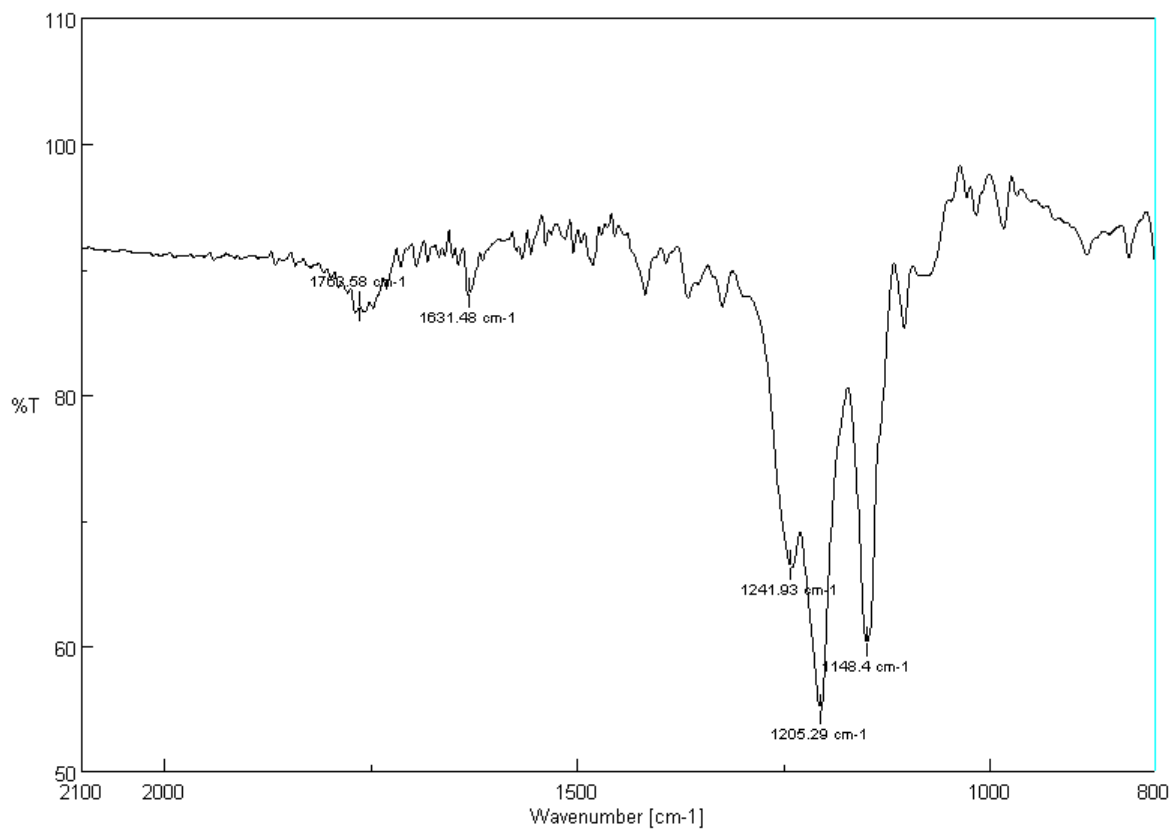

Fig. 10 IR spectrum of **16**

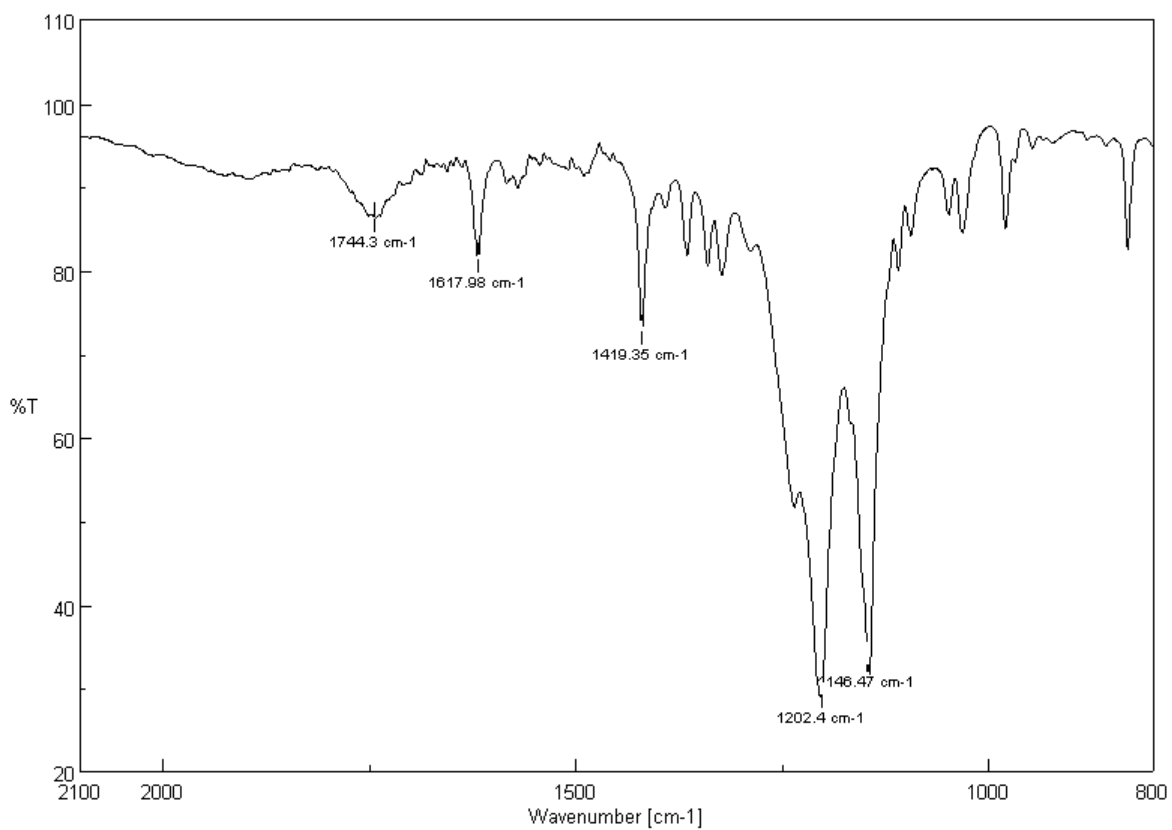

Fig. 11 IR spectrum of **17**

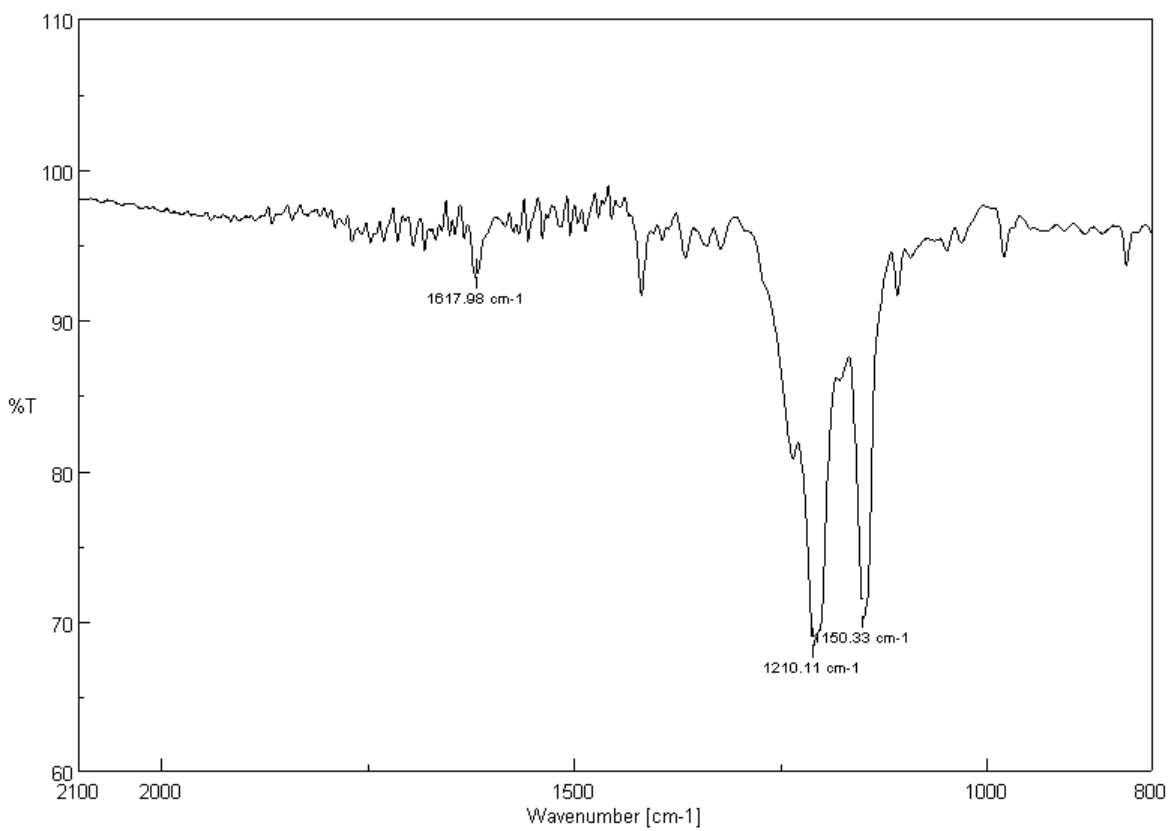

Fig. 12 IR spectrum of **18**

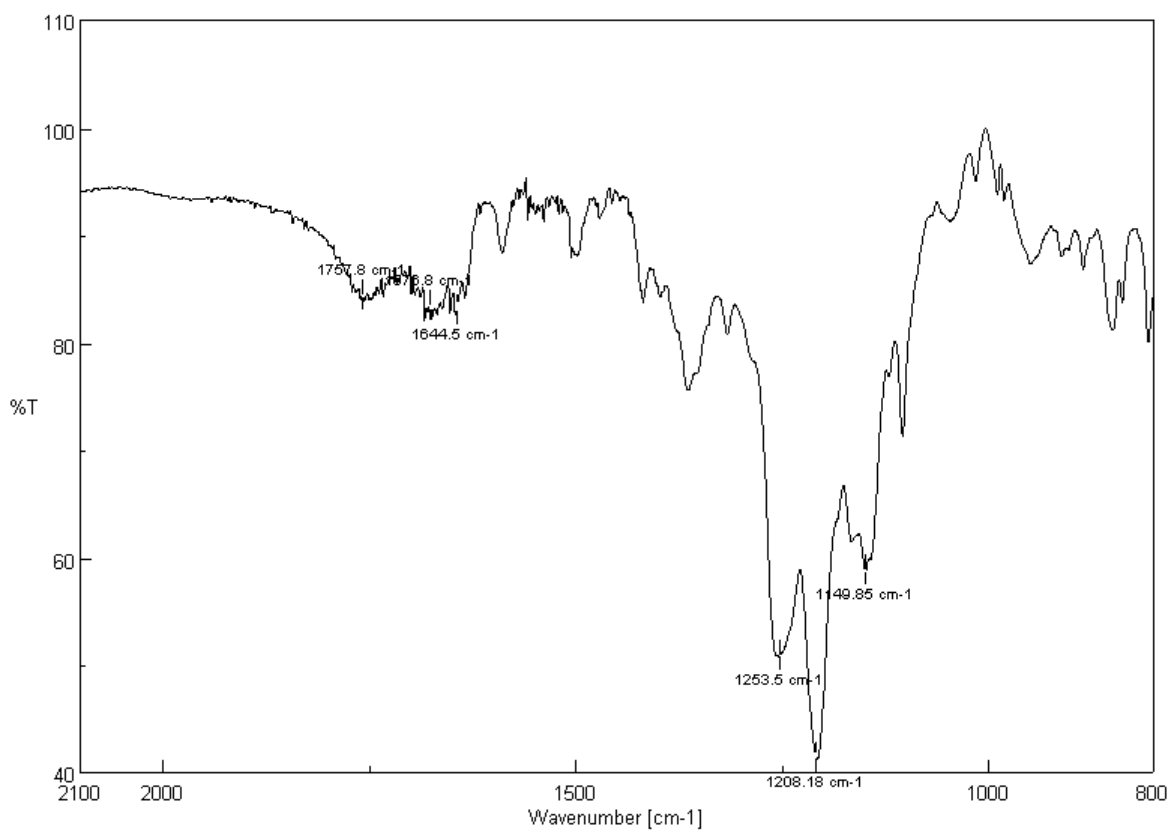

Fig. 13 IR spectrum of **19**

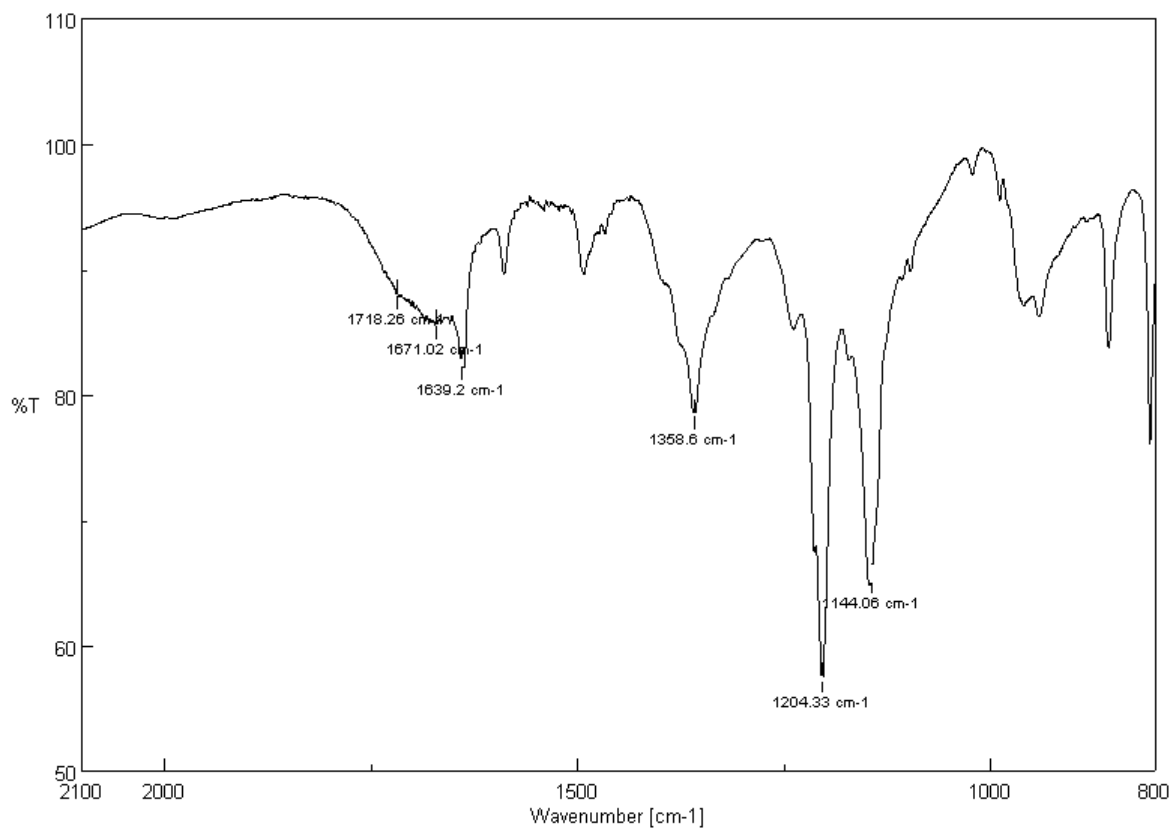

Fig. 14 IR spectrum of **20**



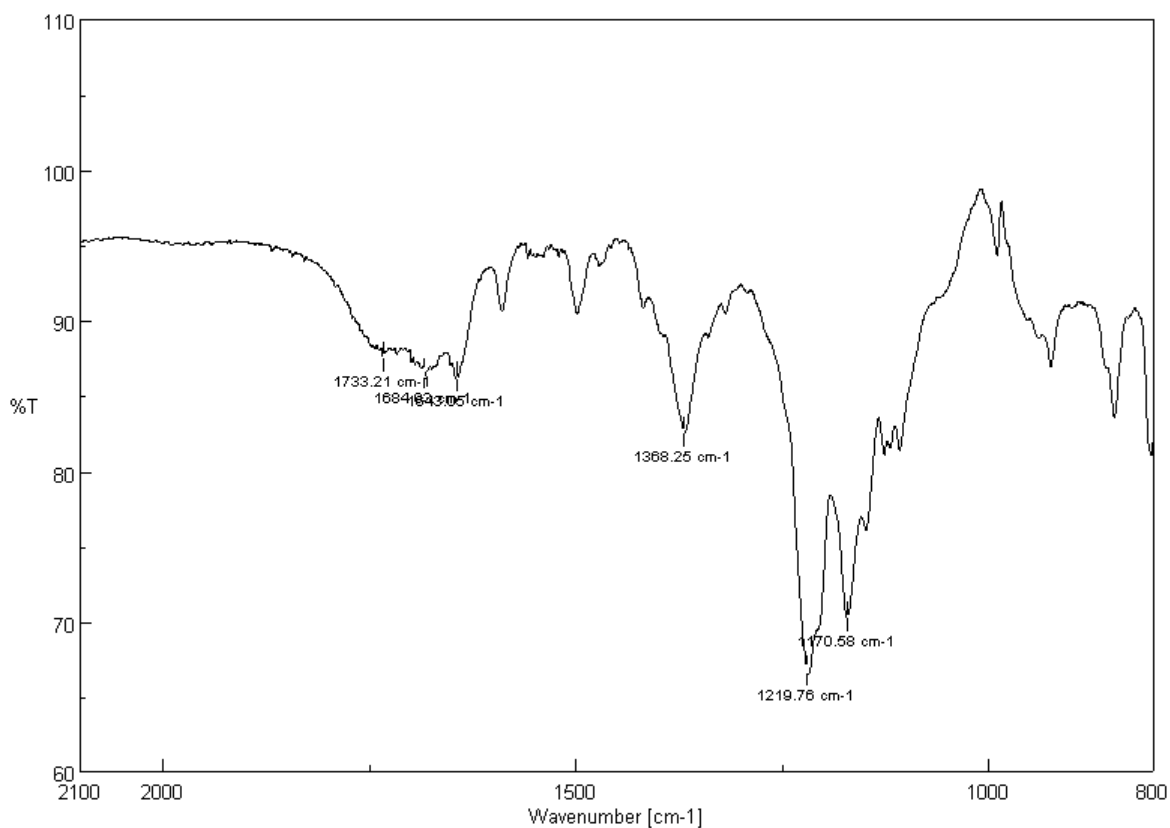

Fig. 15 IR spectrum of **21**

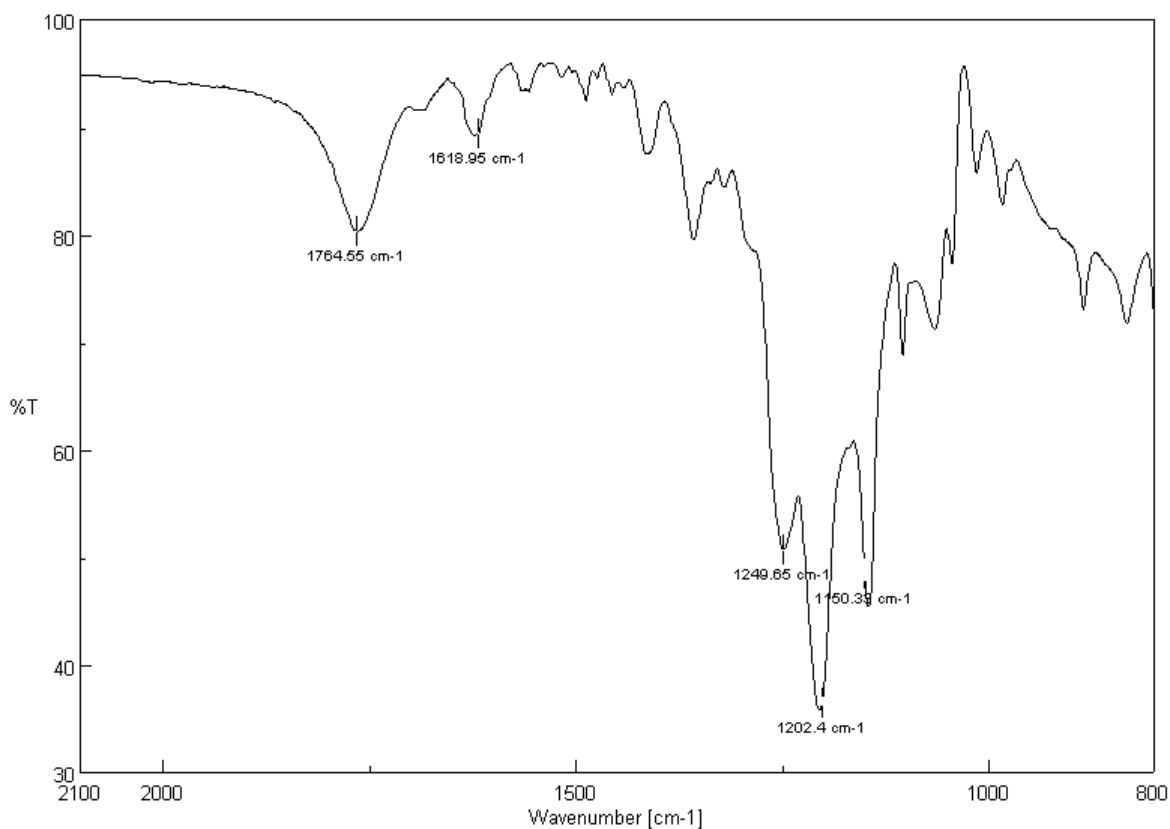

Fig. 16 IR spectrum of **22**

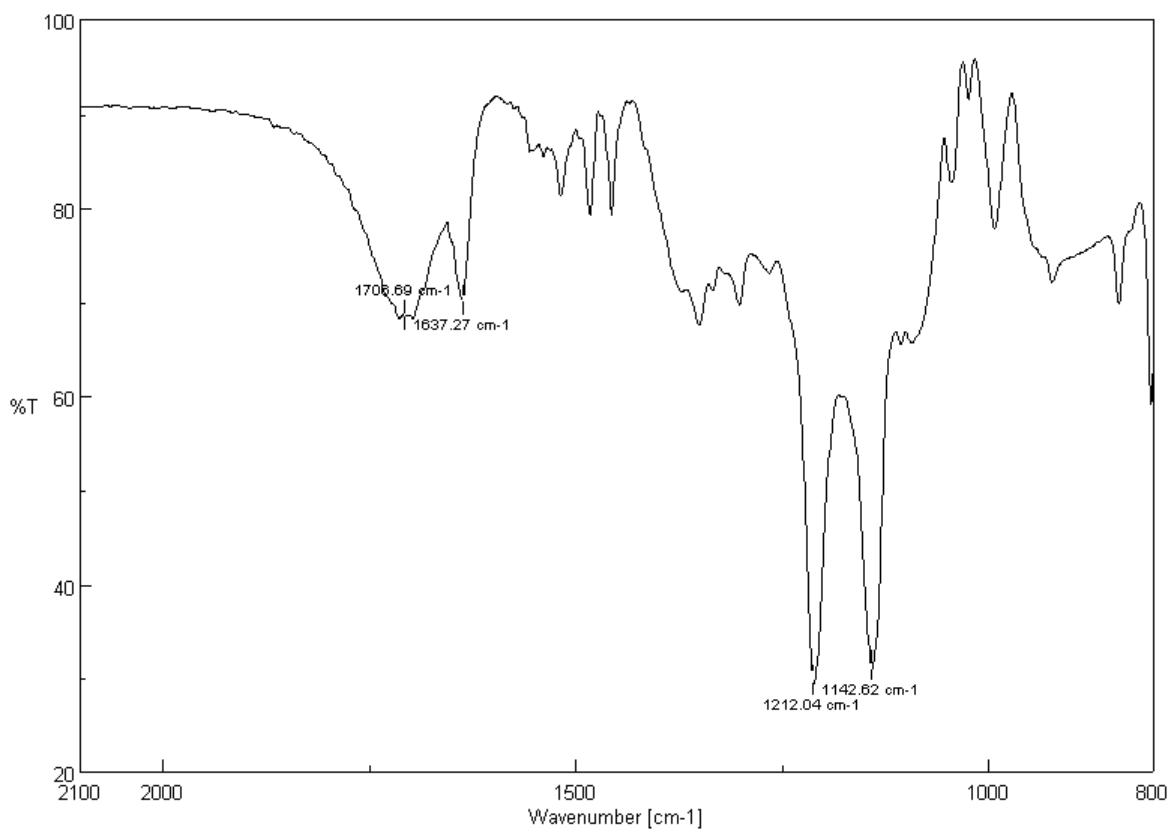

Fig. 17 IR spectrum of **23**

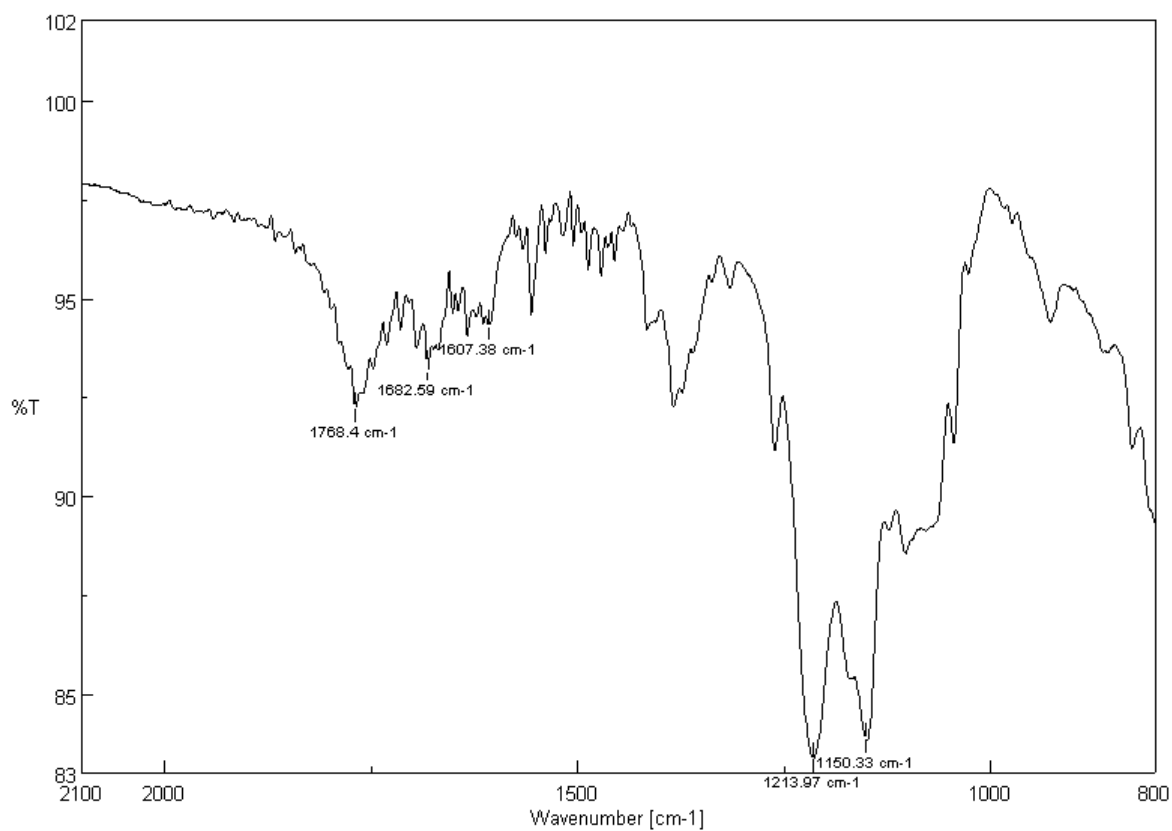

Fig. 18 IR spectrum of **24**

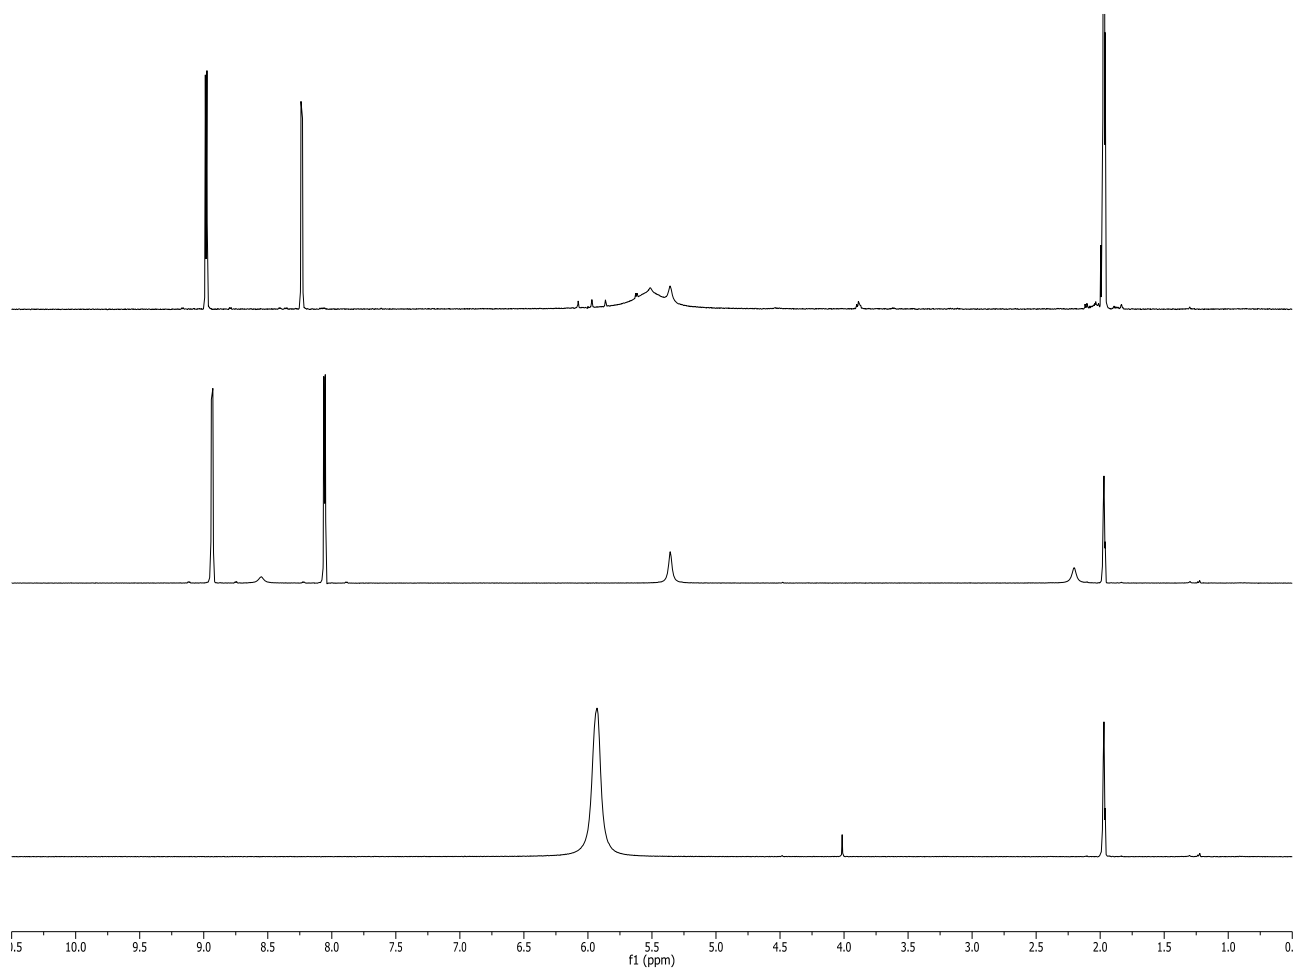

Figure 19:  $^1\text{H}$  NMR spectra ( $\text{CD}_3\text{CN}$ , 500 MHz) of (from top to bottom) **14**, **3** and perfluorosuberic acid.

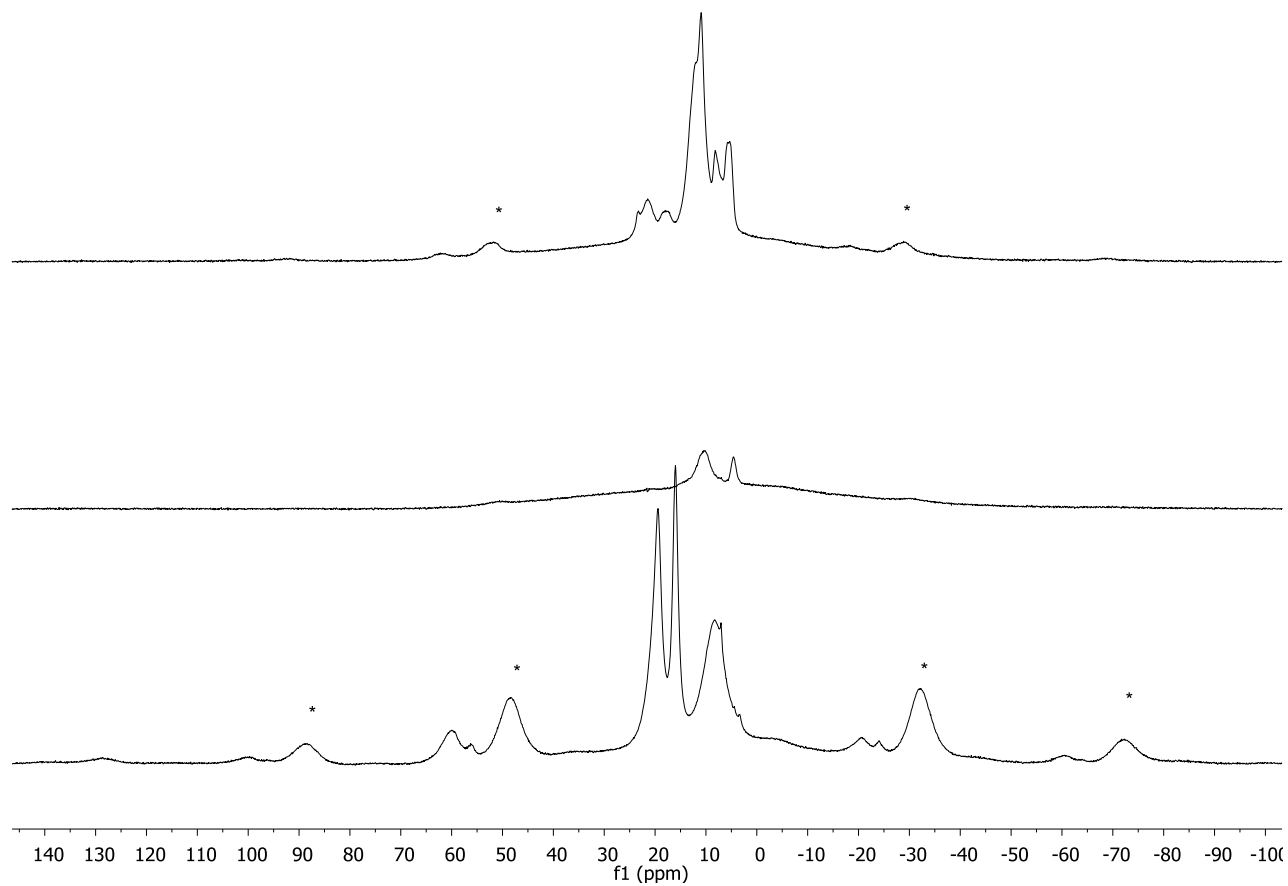

Figure 20:  $^1\text{H}$  (400 MHz) 16 KHz MAS NMR spectra (from top to bottom) **14**, **3** and perfluorosuberic acid.

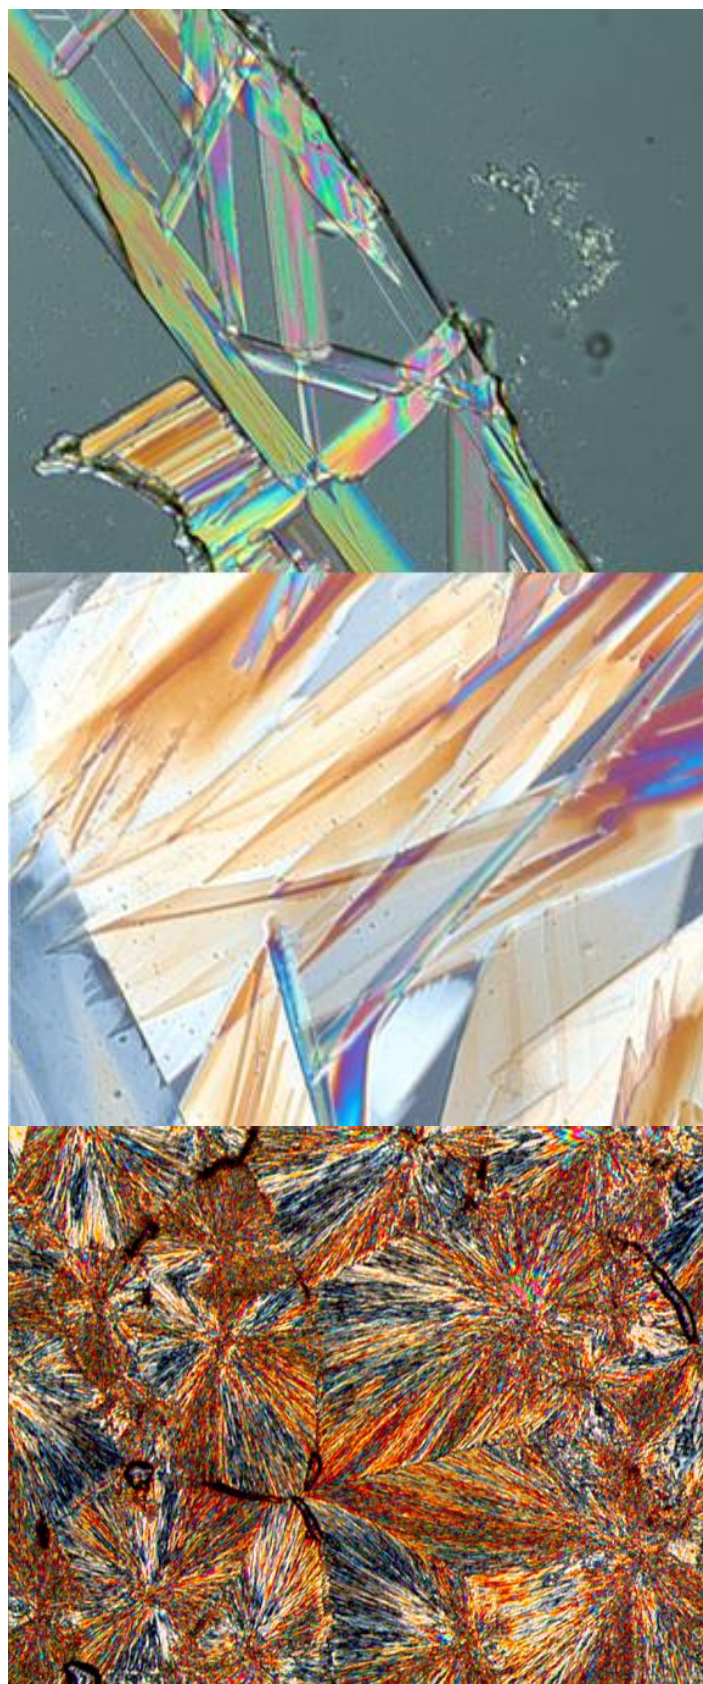

Figure 21: Spherulitic textures of (from top to bottom) **14** **15** and **17** after cooling from the melt.

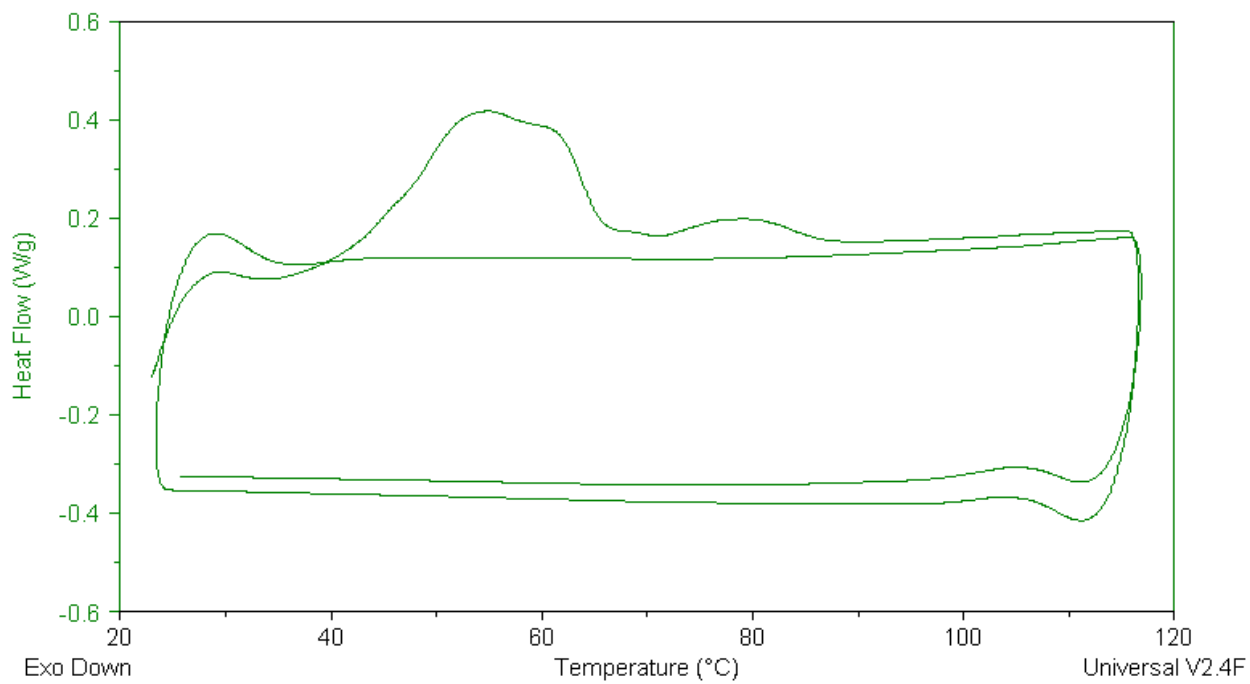

Figure 22. DSC runs (two heating runs followed by two cooling runs) of compound **9**.
